# Supplementary material for: Associations between rheumatoid arthritis clinical factors with synovial cell types and states
Source: bioRxiv or medRxiv preprint supplement (doi:10.1101/2023.04.27.23289104), 2023-04-28
Supplement: Supplementary file [file media-1.pdf]

## SUPPLEMENTARY

**Supplementary Table 1.** Comparison of clinical characteristics across baseline RA treatment categories.

|                                 | (a)<br>No DMARD      | (b)<br>nbDMARD       | (c)<br>b/tsDMARD     | p-value |
|---------------------------------|----------------------|----------------------|----------------------|---------|
| N                               | 29                   | 30                   | 13                   |         |
| Demographics                    |                      |                      |                      |         |
| Age, years                      | 56.6 ±15.4           | 54.1 ±16.8           | 61.7 ±7.92           | 0.323   |
| Female, N (%)                   | 18 (62.1)            | 25 (83.3)            | 11 (84.6)            | 0.136   |
| Race, N (%)                     |                      |                      |                      |         |
| White                           | 19 (65.5)            | 20 (66.7)            | 12 (92.3)            | 0.173   |
| Black                           | 5 (17.2)             | 7 (23.3)             | 1 (7.7)              | 0.518   |
| Other                           | 5 (17.2)             | 1 (3.3)              | 0 (0.0)              | 0.122   |
| RA factors                      |                      |                      |                      |         |
| RA duration, median years [IQR] | 0.05<br>[0.01, 1.47] | 6.77<br>[1.89, 11.6] | 5.47<br>[4.07, 16.0] | <0.001  |
| Seropositive, N (%)             | 24 (82.8)            | 24 (82.8)            | 11 (84.6)            | 1.000   |
| CCP positive, N (%)             | 21 (72.4)            | 22 (75.9)            | 11 (84.6)            | 0.718   |
| RF positive, N (%)              | 22 (75.9)            | 20 (71.4)            | 8 (61.5)             | 0.651   |
| RA clinical measures            |                      |                      |                      |         |
| hsCRP, mg/L median [IQR]        | 8.50<br>[5.50, 18.5] | 10.0<br>[6.00, 24.0] | 6.00<br>[3.00, 12.0] | 0.466   |
| ESR, mm/hr                      | 44.1 ±30.8           | 38.7 ±29.1           | 25.5 ±19.3           | 0.176   |
| Smoking history, N (%)          | 16 (55.2)            | 15 (50.0)            | 7 (53.8)             | 0.951   |
| DAS28-CRP3                      | 4.69 ±1.20           | 4.94 ±1.63           | 4.96 ±1.32           | 0.774   |
| HAQ                             | 1.34 ±0.73           | 1.35 ±0.62           | 0.95 ±0.41           | 0.135   |

Mean ±SD shown unless otherwise noted. Fischer's exact test used to test for differences across CTAPs for binary variables; One-way ANOVA used for continuous variables.

(a) Not on a DMARD at baseline visit; (b) Taking one or more nbDMARDs, not on a concurrent b/tsDMARD; (c) On a b/tsDMARD and could be on a concurrent nbDMARD.
